# Supplementary material
Source: Springer Nature journal article supplement (https://www.springermedizin.de/resource/supplementary/12990_2009_255_MOESM1_ESM.pdf/9612894)

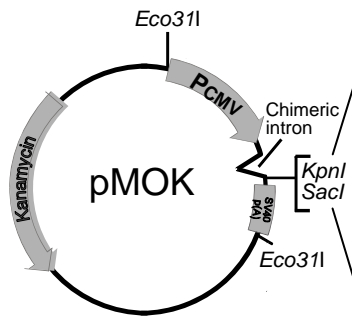

## POMC gene

Signal peptide  
ACTH  
MSH  
END

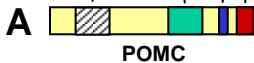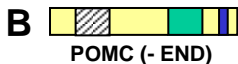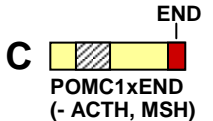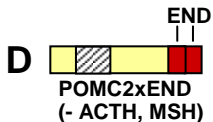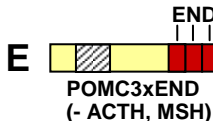

## MIDGE vectors

Chimeric intron  
Signal peptide  
ACTH  
MSH  
END  
SV40 p(A)  
Hairpin ODNs  
NLS  
PCMV

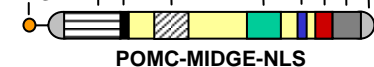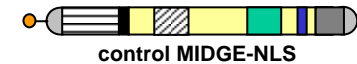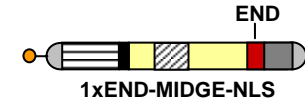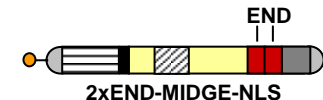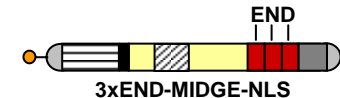

Supplement: MOESM1 [file 9612894]
